# Supplementary material for: Rapidly dissolving poly(vinyl alcohol)/cyclodextrin electrospun nanofibrous membranes
Source: Royal Society of Chemistry journal article supplement (doi:10.1039/c3ra43836h), 2014-01-01
Supplement: c3ra43836h1.pdf [file c3ra43836h1.pdf]

## Supplementary Information

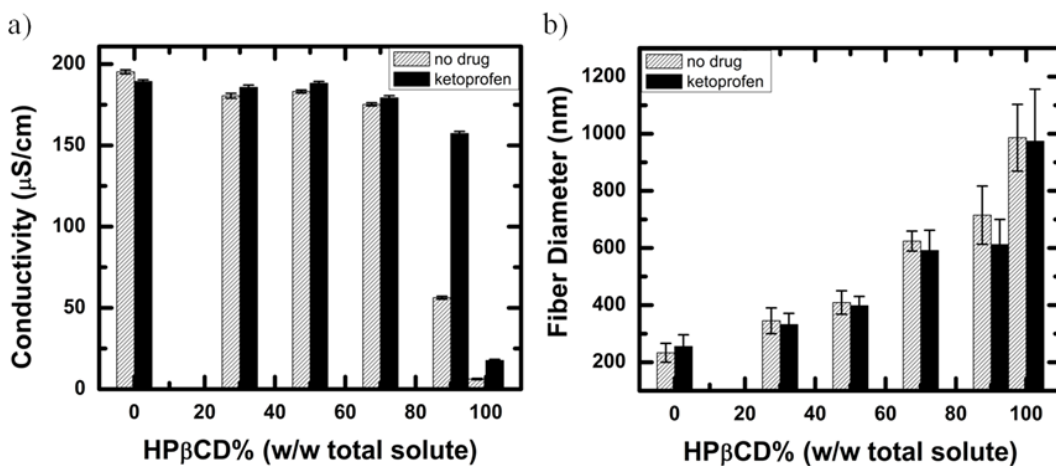

**ESI, Figure 1:** The a) conductivity of the PVA/HP $\beta$ CD electrospinning solutions and b) average fiber diameter of fibers produced as a function of HP $\beta$ CD% (w/w total solute) of neat and ketoprofen loaded fibers.

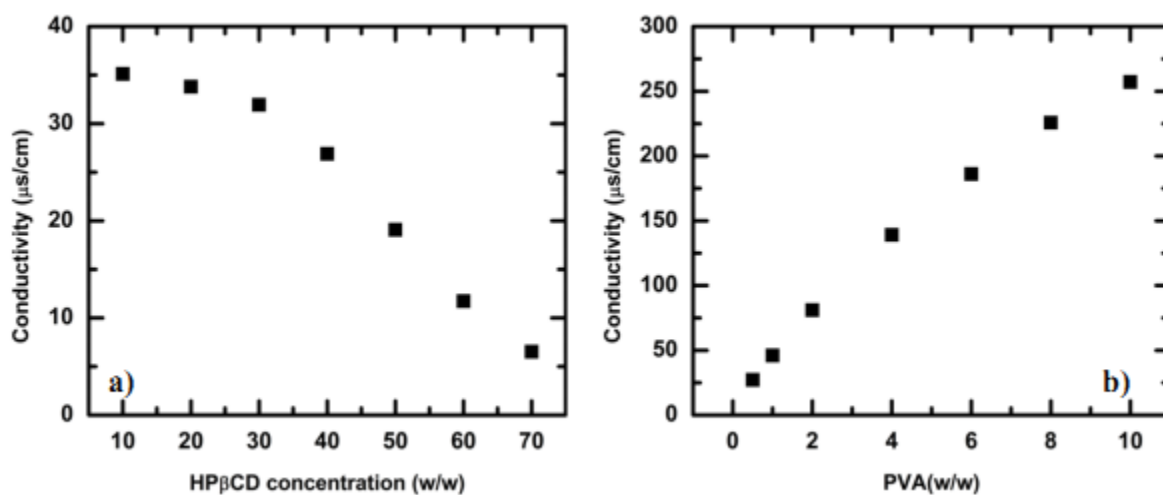

**ESI, Figure 2:** The conductivity of neat (a) HP $\beta$ CD and (b) PVA in aqueous solutions as a function of concentration. Conductivity decreases with increasing HP $\beta$ CD content, but increases with increasing PVA content.

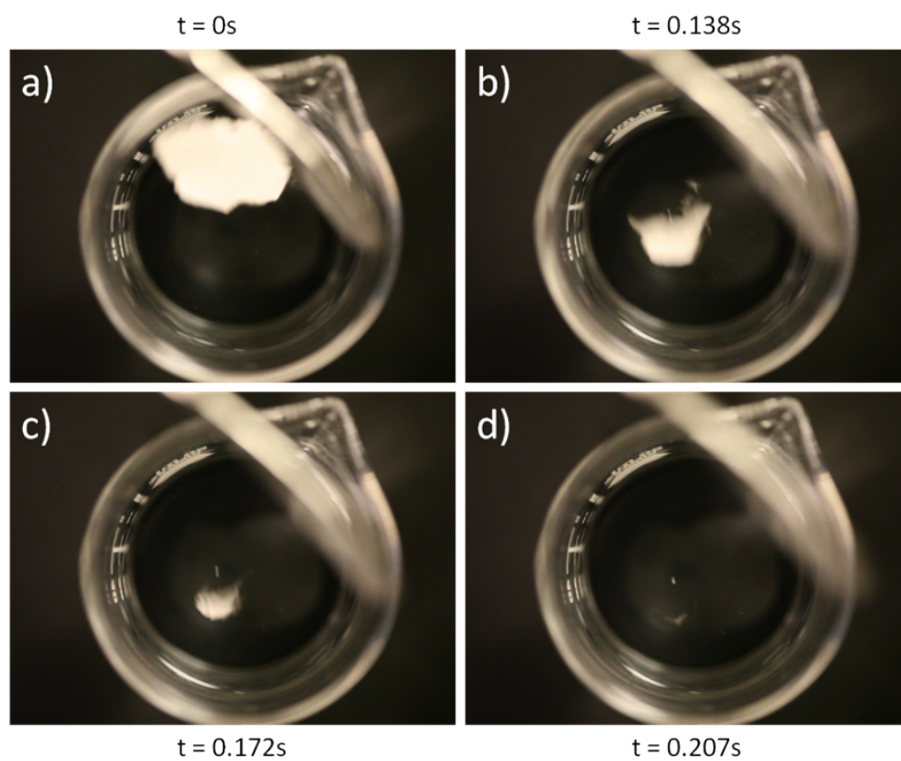

ESI, Figure 3: The evolution of the dissolution of ketoprofen loaded HP $\beta$ CD fibers with respect to time.

| Blend<br>(HP $\beta$ CD/PVA) | Viscosity (cP) |                   | Surface Tension (dynes/cm) |                   |
|------------------------------|----------------|-------------------|----------------------------|-------------------|
|                              | without drug   | ketoprofen loaded | without drug               | ketoprofen loaded |
| <b>0/100</b>                 | 185 $\pm$ 7    | 192 $\pm$ 8       | 52.7 $\pm$ 0.7             | 51.0 $\pm$ 0.6    |
| <b>30/70</b>                 | 195 $\pm$ 9    | 212 $\pm$ 11      | 53.5 $\pm$ 0.5             | 51.7 $\pm$ 0.7    |
| <b>50/50</b>                 | 344 $\pm$ 10   | 325 $\pm$ 11      | 54.2 $\pm$ 0.9             | 52.3 $\pm$ 0.6    |
| <b>70/30</b>                 | 554 $\pm$ 16   | 524 $\pm$ 12      | 54.5 $\pm$ 0.9             | 53.7 $\pm$ 0.9    |
| <b>90/10</b>                 | 213 $\pm$ 12   | 221 $\pm$ 12      | 58.6 $\pm$ 0.7             | 58.6 $\pm$ 0.5    |
| <b>100/0</b>                 | 3250 $\pm$ 45  | 3451 $\pm$ 34     | 58.0 $\pm$ 0.9             | 57.2 $\pm$ 0.8    |

**ESI, Table 1:** Solution parameters for aqueous electrospinning solutions containing HP $\beta$ CD/PV A blends with and without ketoprofen.
